# Supplementary material for: Model development for enzymatic reactive crystallization of β-lactam antibiotics: a reaction–diffusion-crystallization approach
Source: Royal Society of Chemistry journal article supplement (doi:10.1039/d0re00276c), 2020-01-01

# Model development for enzymatic reactive crystallization of $\beta$ -lactam antibiotics: A reaction-diffusion-crystallization approach

Hossein Salami<sup>1</sup>, Colton E. Lagerman<sup>1</sup>, Patrick R. Harris<sup>1</sup>, Matthew A. McDonald<sup>1</sup>, Andreas S. Bommarius<sup>1</sup>, Ronald W. Rousseau<sup>1</sup>, Martha A. Grover<sup>1\*</sup>

*School of Chemical and Biomolecular Engineering, Georgia Institute of Technology, Atlanta GA, 30332*

## Enzymatic reaction kinetic parameters

*Table S1. Reaction kinetic parameters for reaction network of Figure 1 for ampicillin and cephalixin synthesis systems. Adopted from Ref. [11].  $K_N$  is assumed to be a function of pH as  $K_N = 0.0011e^{pH \times 0.525}$ . The preexponential term for CEX is 0.0005.*

| API        | $K_S$ (M) | $K_P$ (M) | $K_N$ (M) | $k_2$ (s <sup>-1</sup> ) | $k_3$ (s <sup>-1</sup> ) | $k_4$ (s <sup>-1</sup> ) | $k_{-4}$ (s <sup>-1</sup> ) | $k_5$ (s <sup>-1</sup> ) | $K_{A1}$     | $K_{A2}$     |
|------------|-----------|-----------|-----------|--------------------------|--------------------------|--------------------------|-----------------------------|--------------------------|--------------|--------------|
| Ampicillin | 0.38      | 0.095     | 0.043     | 162                      | 44                       | 235                      | 217                         | 9.0                      | $10^{-7.52}$ | $10^{-8.19}$ |
| Cephalexin | 0.38      | 0.057     | 0.019     | 162                      | 44                       | 316                      | 217                         | 6.3                      | $10^{-7.52}$ | $10^{-8.19}$ |

## Crystallization kinetic parameters

*Table S2. Crystallization kinetics parameters for ampicillin trihydrate and cephalixin monohydrate crystals from Ref. [14,15].*

| Substrate  | $k_{B1}$ (min <sup>-1</sup> L <sup>-1</sup> ) | $B_0$ | $k_{B2}$ (min <sup>-1</sup> L <sup>-1</sup> ) | $b$ | $m$  | $s$  | $k_G$ (μm min <sup>-1</sup> ) | $g$  |
|------------|-----------------------------------------------|-------|-----------------------------------------------|-----|------|------|-------------------------------|------|
| Ampicillin | $5.00 \times 10^{10}$                         | 1.27  | $2.20 \times 10^9$                            | 0.6 | -    | 1.37 | 8.95                          | 1.87 |
| Cephalexin | 2.54                                          | 1.79  | $2.98 \times 10^5$                            | 1.0 | 0.46 | -    | 6.52                          | 2.00 |

*Ampicillin trihydrate crystallization kinetic equations [15]*

$$B_1 = k_{B1} \exp\left(\frac{-B_0}{\ln^2 S}\right) \quad B_2 = k_{B2} M^b (S - 1)^s \quad G = k_G (S - 1)^g$$

*Cephalexin monohydrate crystallization kinetic equations [14]*

$$B_1 = k_{B1} S \exp\left(\frac{-B_0}{\ln^2 S}\right) \quad B_2 = k_{B2} G^b M^m \quad G = k_G (S - 1)^g$$

$b$  = secondary nucleation mass of crystals exponent

$B_0$  = primary nucleation constant

$g$  = growth rate exponent

$G$  = crystal growth rate (μm / min)

$k_{Bi}$  = primary/secondary nucleation rate constant (# / min.L)

## Acid dissociation equilibrium constants for different species (Ref. [11])

| API | PGME | 7ADCA | 6APA | CEX  | AMP  | PG   |
|-----|------|-------|------|------|------|------|
| pKa | 7.24 | 6.26  | 4.83 | 7.12 | 7.31 | 9.14 |

## Calculation of cephalexin effective diffusion coefficient

The effective diffusion coefficient of cephalexin was determined using the Grunwald method Ref. [13]. Briefly, a known mass of ChiralVision Immobeads (COV2) were equilibrated with a known concentration of cephalexin in a known volume of solution. After filtration, the Immobeads were placed into a known volume of well-mixed DI water and samples were withdrawn periodically for HPLC analysis. Experimental concentrations as a function of time were used to fit the effective diffusion coefficient according to the equation below, where  $c_t$  is the cephalexin concentration at time,  $t$ ,  $c_\infty$  is the concentration at infinite time, and  $R$  is the average radius of the Immobeads.

$$c_t = c_\infty \left( 1 - e^{-\left(\frac{\pi^2 D_{eff}}{R^2}\right)t} \right)$$

## Reported thermodynamic solubility of cephalexin and ampicillin

Figure S1. Cephalexin and ampicillin thermodynamic solubility in water at 25 °C as a function of pH [30,14]. Corresponding ionic strengths are not explicitly reported in these studies, however, considering the  $pK_a$  values it can be estimated by the API concentration.

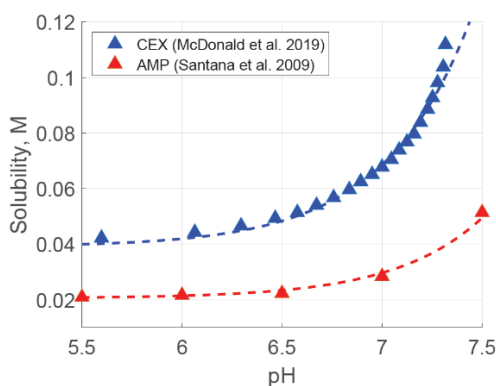

## Estimation of bead size distribution for Immobead (COV2) and ReliZyme (S) carriers

Size distribution of carrier particles was estimated by optical microscopy followed by image analysis in MATLAB. A fixed mass of each bead sample was mixed with water and then sampled with a pipet with enlarged tip for acquiring images under optical microscope. Image analysis was performed with MATLAB and consisted of : 1- loading the image, 2- convert to grayscale, 3- removing the background, 4- convert to binary image, 5- use *strel* and *regionprops* functions to detect disks with the largest size, save their size, and remove them from the image, 6- continue until all objects are removed. For both samples, the obtained distribution closely matched information provided by the vender.

Figure S2. Example of the optical image and processed image for ReliZyme beads. Objects detected on edges were excluded in estimating size distribution.

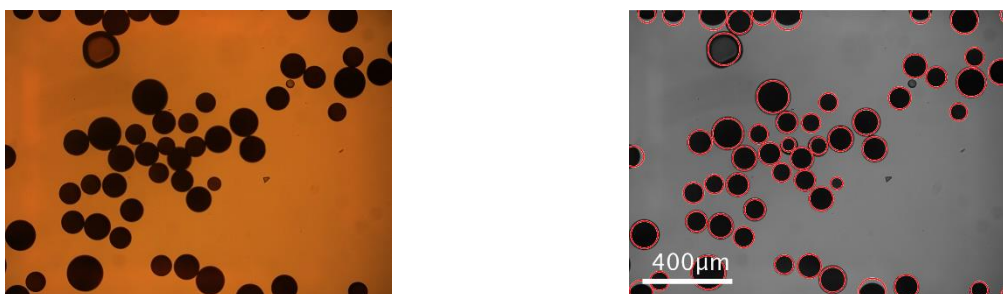

## Numerical simulation framework

(Code available at: [github.com/GroverGroup/Reactive-Crystallization](https://github.com/GroverGroup/Reactive-Crystallization))

### Initialize the system:

- Biocatalyst loading → enzyme conc. in carrier
- Total Enzyme mass → total number of carriers
- Reactor volume
- Initial conc.
- Initial pH

Using the initial conc. define the system's state vector  $\vec{u}$  for the discretized spatial domain with three parts:

- 1- Internal conc. in the carrier
- 2- Bulk phase conc.
- 3- Crystal moments (nonzero if seeded)

| Internal conc. |           |         | Bulk conc. |         |           | CSD moments |         |         |
|----------------|-----------|---------|------------|---------|-----------|-------------|---------|---------|
| $\dots$        | $S_{i-1}$ | $\dots$ | $n_{i-1}$  | $\dots$ | $p_{i-1}$ | $s$         | $n$     | $\dots$ |
|                |           |         |            |         |           | $\mu_0$     | $\mu_1$ | $\dots$ |

Explicitly solve the set of ordinary differential equations (ODEs) . At each timestep:

### Reaction-diffusion module:

- 1- If pH is fixed, calculate the required titrant ( $\text{Na}^+$ ), update its bulk and interface conc. and reactor volume
- 2- Based on the current state, calculate the local pH using equilibrium constants and electroneutrality
- 3- Based on the local pH, calculate the amount of each species in charged and neutral state at each node
- 4- Using equation (2-3) calculate the flux of each species
- 5- Using equation (1) find the consumption/production rate of each species due to reaction
- 6- Calculate the overall rate of change due to reaction and diffusion for each species at each internal node
- 7- Calculate the rate of change in the bulk using mass conservation at the interface

### Crystallization module:

- 1- Calculate the solubility based on current bulk pH and solution's ionic strength
- 2- Calculate the supersaturation of the product
- 3- If supersaturation is  $> 1$ :
  - i. Calculate the primary nucleation rate
  - If supersaturation is  $> 1$  and moment of CSD  $\neq 0$ :
    - i. Calculate the secondary nucleation rate
    - ii. Calculate the growth rate
- 4- Calculate the overall rate of change of CSD moments using B and G
- 5- Update the rate of change of bulk and interface conc. for the crystallizing agent

## Calculation of enzyme loading on beads with different size in a carrier sample

If multiple representative carrier radii are to be considered in the model, a new challenge arises, that is how should enzyme loading be calculated for individual beads. In a sample with a single radius, all carriers would have a similar loading = total mass of enzyme used/total mass of carriers. When multiple bead sizes are to be considered in the model, using above equation for calculating the enzyme loading into each carrier assumes that enzyme immobilization is a size-independent but more thermodynamically driven phenomenon. In other words, all carrier particles have similar enzyme concentration loaded into them driven by the protein concentration in the immobilization solution. Another alternative method for calculating enzyme loading is to assume that to be dependent on the outer surface area of the bead. Smaller carriers in a sample make a larger portion of the total available surface area, but they have a smaller mass compared to larger carriers. This can be the basis for calculating enzyme loading on each carrier particle, i.e., g enzyme / g carrier =  $\frac{(A_1 \cdot R^2)}{(A_2 \cdot R^3)} = A \cdot R^{-1}$ , where  $A_1$  and  $A_2$  are proportionality constants. The value for constant A and so enzyme loading for each carrier size can be calculated using enzyme mass conservation, total enzyme mass =  $\frac{4 \cdot \pi \cdot \rho \cdot A}{3} \sum n_j R_j^2$ , where  $n_j$  is the number of beads for each size bin in a specific bead sample.

Figure S3. Enzyme mass and enzyme concentration in individual beads in a sample of commercial Immobead (COV2) porous carriers, calculated based on assumption of surface-dependent loading.

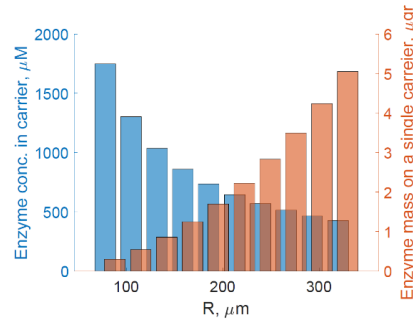

## Initial rate experiments sensitivity to immobilization for ampicillin synthesis

Figure S4. Simulations of SH ratio measurements in initial rate experiments for ampicillin synthesis using immobilized PGA. Simulation conditions are similar to those of Figure 10 in the main text.

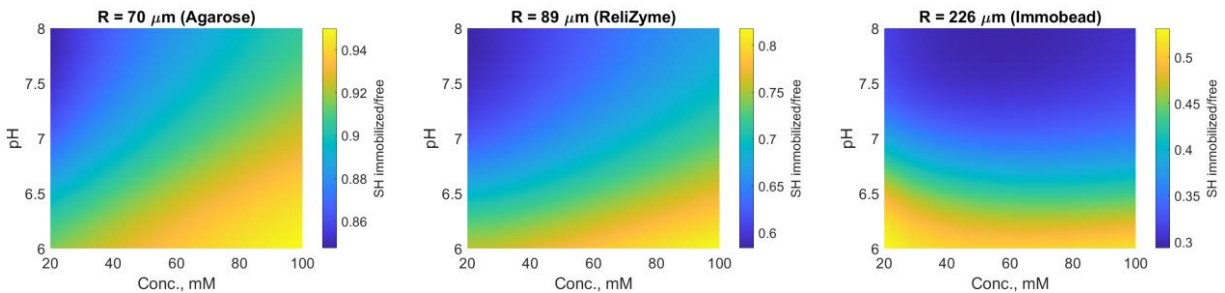

## Comparison of batch crystal productivity at different pH values for ampicillin and cephalixin crystals.

Figure S5. Comparison of batch crystal productivity at different pH values for ampicillin and cephalixin crystals. Simulations were performed for  $s_0 = 0.3$  and  $n_0 = 0.2$  M, with total enzyme concentration of  $5 \mu\text{M}$  immobilized on ReliZyme carriers with "high" loading. Dynamic simulation was halted at byproduct concentration of  $0.05$  M.

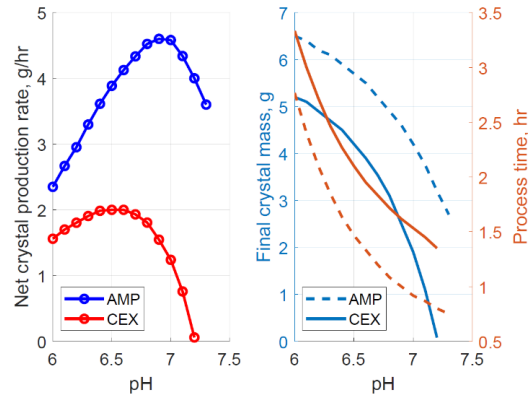

Supplement: d0re00276c1.pdf [file d0re00276c1.pdf]
